# Supplementary material for: Spatial Heterogeneity, Host Movement and Mosquito-Borne Disease Transmission
Source: PubMed Central journal article supplement (PMC4452543; doi:10.1371/journal.pone.0127552), 2015-06-01
Supplement: pone.0127552.s001.pdf [file pone.0127552.s001.pdf]

# 1 Spatial heterogeneity, host movement and vector-borne disease 2 transmission

3 Miguel A. Acevedo<sup>1,\*</sup>, Olivia Prosper<sup>2</sup>, Kenneth Lopiano<sup>3</sup>, Nick Ruktanonchai<sup>4</sup>, T. Trevor Caughlin<sup>4</sup>,  
4 Maia Martcheva<sup>5</sup>, Craig W. Osenberg<sup>4</sup>, David L. Smith<sup>6</sup>.

5 **1 University of Puerto Rico–Río Piedras, Department of Biology, San Juan, PR, USA**

6 **2 Dartmouth College, Department of Mathematics, Hanover, NH, USA**

7 **3 Statistical and Applied Mathematical Sciences Institute, Research Triangle Park, NC,  
8 USA**

9 **4 University of Florida, Department of Biology, Gainesville, FL, USA**

10 **5 University of Florida, Department of Mathematics, Gainesville, FL, USA**

11 **6 Department of Epidemiology and Malaria Research Institute, John Hopkins Bloomberg  
12 School of Public Health, Baltimore, MD, USA**

13 \* **E-mail: miguel.acevedo7@upr.edu**

## 14 Supporting Information 1

15 The Ross-Macdonald model describes the proportion of humans infected ( $i$ ) and the proportion of  
16 mosquitoes infected ( $z$ ) over time:

$$\frac{dz}{dt} = aci(1 - z) - gz \quad (1)$$

$$\frac{di}{dt} = mabz(1 - i) - ri, \quad (2)$$

17 where  $1 - z$  and  $1 - i$  describe the proportion of susceptible mosquitoes and susceptible humans respectively.

18 We modified the Ross-Macdonald model [1] to account for the change in the number of humans  
19 infected (instead of the proportion), leading to the following set of equations:

$$\frac{dz}{dt} = ac \frac{I}{N} (1 - z) - gz \quad (3)$$

$$\frac{dI}{dt} = mabz(N - I) - rI, \quad (4)$$

20 where  $N$  is the total size of the human population of interest, and  $I$  is the number of humans infected  
 21 with malaria. Thus,  $N - I$  represents the number of humans who are susceptible.

22 The parameter  $a$  is the rate mosquitoes bite humans,  $c$  is the probability a mosquito becomes infected  
 23 given that the mosquito has bitten an infected human,  $b$  is the probability a susceptible human being was  
 24 infected given a mosquito bite from an infected mosquito,  $g$  is the mosquito death rate,  $m$  is the ratio  
 25 of the abundance of mosquitoes to humans and  $r$  is the recovery rate of infected humans. In this model  
 26 there is no immunity after infection. Because the model without human demography is asymptotically  
 27 equivalent to the model with demography, and because we are interested in equilibrium behavior, we  
 28 omitted human births and deaths for simplicity.

29 We have incorporated two modifications to the original model. First, given the high mortality rate  
 30 of mosquitoes, many may not survive to become infectious; hence we replaced  $(1 - z)$  with  $e^{-gn} - z$  [2],  
 31 where  $n$  is the extrinsic incubation period.

Second, we incorporated immigration and emigration between all  $Q$  patches resulting in the following  
 system of  $3 \times Q$  equations:

$$\frac{dz_i}{dt} = a_i c_i \frac{I_i}{N_i} (e^{-g_i n_i} - z_i) - g_i z_i \quad (5)$$

$$\frac{dI_i}{dt} = m_i a_i b_i z_i (N_i - I_i) - r_i I_i - I_i \sum_{j \neq i}^Q k_{ji} + \sum_{j \neq i}^Q k_{ij} I_j \quad (6)$$

$$\frac{dN_i}{dt} = -N_i \sum_{j \neq i}^Q k_{ji} + \sum_{j \neq i}^Q k_{ij} N_j \quad (7)$$

Under the assumptions specified in the main manuscript, our model simplifies to:

$$\begin{aligned} \frac{dz_i}{dt} &= ac \frac{I_i}{N} (e^{-gn} - z_i) - gz_i \\ \frac{dI_i}{dt} &= m_i ab z_i (N - I_i) - r I_i - I_i \sum_{j \neq i}^Q k + \sum_{j \neq i}^Q k I_j \end{aligned} \quad (8)$$

## 32 References

- 33 1. Bailey NTJ (1982) The biomathematics of malaria. Oxford University Press.
- 34 2. Smith D, McKenzie F (2004) Statics and dynamics of malaria infection in *Anopheles* mosquitoes.
