# Supplementary material for: Spatial Heterogeneity, Host Movement and Mosquito-Borne Disease Transmission
Source: PubMed Central journal article supplement (PMC4452543; doi:10.1371/journal.pone.0127552), 2015-06-01
Supplement: pone.0127552.s002.pdf [file pone.0127552.s002.pdf]

# 1 Spatial heterogeneity, host movement and vector-borne disease 2 transmission

3 Miguel A. Acevedo<sup>1,\*</sup>, Olivia Prosper<sup>2</sup>, Kenneth Lopiano<sup>3</sup>, Nick Ruktanonchai<sup>4</sup>, T. Trevor Caughlin<sup>4</sup>,  
4 Maia Martcheva<sup>5</sup>, Craig W. Osenberg<sup>4</sup>, David L. Smith<sup>6</sup>.

5 **1 University of Puerto Rico–Río Piedras, Department of Biology, San Juan, PR, USA**

6 **2 Dartmouth College, Department of Mathematics, Hanover, NH, USA**

7 **3 Statistical and Applied Mathematical Sciences Institute, Research Triangle Park, NC,  
8 USA**

9 **4 University of Florida, Department of Biology, Gainesville, FL, USA**

10 **5 University of Florida, Department of Mathematics, Gainesville, FL, USA**

11 **6 Department of Epidemiology and Malaria Research Institute, John Hopkins Bloomberg  
12 School of Public Health, Baltimore, MD, USA**

13 \* **E-mail: miguel.acevedo7@upr.edu**

## 14 Supporting Information 2

**Theorem 0.0.1.** *If  $R_0 > 1$ , System (1) in the main text exhibits uniform weak persistence; that is, there exists an  $\epsilon > 0$  such that*

$$\limsup_{t \rightarrow \infty} \sum_{i=1}^Q I_i(t) + z_i(t) \geq \epsilon,$$

15 *whenever  $\sum_{i=1}^Q I_i(0) + z_i(0) > 0$ .*

*Proof.* By way of contradiction, suppose  $\limsup_{t \rightarrow \infty} \sum_{i=1}^Q I_i(t) + z_i(t) < \epsilon$  for all  $\epsilon > 0$ . Then,  $I_i(t) \leq \epsilon$  and  $z_i(t) \leq \epsilon$  for all  $t$ , and for each  $i = 1, 2, \dots, Q$ . From System 1 in the main text, we obtain the following inequalities:

$$\begin{aligned} \frac{dI_i(t)}{dt} &\geq \xi_i(\epsilon)z_i - [r + (Q-1)k]I_i + k \sum_{j \neq i}^Q I_j \\ \frac{dz_i(t)}{dt} &\geq \eta_i(\epsilon)I_i - gz_i, \quad i = 1, \dots, Q \end{aligned}$$

where  $\xi_i(\epsilon) = m_i ab(N - \epsilon)$  and  $\eta_i(\epsilon) = ac \frac{I_i}{N} (e^{-gn} - \epsilon)$ . Note that

$$\begin{aligned} \frac{dX_i(t)}{dt} &= \xi_i(\epsilon)y_i - [r + (Q - 1)k]X_i + k \sum_{j \neq i}^Q X_j \\ \frac{dy_i(t)}{dt} &= \eta_i(\epsilon)X_i - gy_i, \quad i = 1, \dots, Q \end{aligned}$$

is a linear system of  $2Q$  equations, and can be written in the form  $\mathbf{W}' = J(\epsilon)\mathbf{W}$ , where

$$\mathbf{W} = (y_1, y_2, \dots, y_Q, X_1, X_2, \dots, X_Q)^T,$$

and

$$J(\epsilon) = \begin{bmatrix} J_{1,1} & J_{1,2}(\epsilon) \\ J_{2,1}(\epsilon) & J_{2,2} \end{bmatrix},$$

where each  $J_{i,j}$  is a  $Q \times Q$  block matrix defined by  $J_{1,1} = \text{diag}(-g, -g, \dots, -g)$ ,  $J_{1,2}(\epsilon) = \text{diag}(\eta_1(\epsilon), \eta_2(\epsilon), \dots, \eta_Q(\epsilon))$ ,  $J_{2,1}(\epsilon) = \text{diag}(\xi_1(\epsilon), \xi_2(\epsilon), \dots, \xi_Q(\epsilon))$ , and

$$J_{2,2}(\epsilon) = \begin{bmatrix} -[r + (Q - 1)k] & k & \cdots & k \\ k & -[r + (Q - 1)k] & \cdots & k \\ \vdots & \vdots & \ddots & \vdots \\ k & k & \cdots & -[r + (Q - 1)k] \end{bmatrix}.$$

16 Because  $\xi_i(0) = m_i abN = \alpha_i N$  and  $\eta_i(0) = \frac{ace^{-gn}}{N} = \frac{\beta}{N}$ ,  $J(0)$  is precisely the Jacobian of System (1) in  
 17 the main text evaluated at the disease-free equilibrium. Furthermore,  $I_i(t) \geq X_i(t)$  for all  $t$  and for each  
 18  $i$ , provided they have the same initial conditions.

19 Let  $F(\epsilon)$  and  $V$  be such that  $F(\epsilon) = \begin{bmatrix} 0 & J_{1,2}(\epsilon) \\ J_{2,1}(\epsilon) & 0 \end{bmatrix}$ , and  $V = \begin{bmatrix} J_{1,1} & 0 \\ 0 & J_{2,2} \end{bmatrix}$ . Then,  $J(\epsilon) =$   
 20  $F(\epsilon) - V$ .

21 Let  $R(\epsilon) := (\rho(F(\epsilon)V^{-1}))^2$ , the square of the spectral radius of the matrix  $FV^{-1}$ . Then,  $\lim_{\epsilon \rightarrow 0} R(\epsilon) =$   
 22  $R_0$ . Because  $R_0 > 1$ , this implies that there exists an  $\epsilon' > 0$  such that  $R(\epsilon') > 1$ . Because  $F(\epsilon')$  is nonneg-  
 23 ative and  $V$  is a non-singular M-matrix,  $\rho(F(\epsilon')V^{-1}) > 1$  implies that at least one eigenvalue lies in the

24 right half of the complex plane. Hence, the spectrum of  $J(\epsilon')$  has an eigenvalue with positive real part,  
25 implying that  $\lim_{t \rightarrow \infty} I_i(t) = \infty$  or  $\lim_{t \rightarrow \infty} z_i(t) = \infty$  for some  $i$ , which is a contradiction. Therefore,  
26 the conclusion of the theorem holds.

27

□
