# Supplementary material for: Spatial Heterogeneity, Host Movement and Mosquito-Borne Disease Transmission
Source: PubMed Central journal article supplement (PMC4452543; doi:10.1371/journal.pone.0127552), 2015-06-01
Supplement: pone.0127552.s003.pdf [file pone.0127552.s003.pdf]

# 1 Spatial heterogeneity, host movement and vector-borne disease 2 transmission

3 Miguel A. Acevedo<sup>1,\*</sup>, Olivia Prosper<sup>2</sup>, Kenneth Lopiano<sup>3</sup>, Nick Ruktanonchai<sup>4</sup>, T. Trevor Caughlin<sup>4</sup>,  
4 Maia Martcheva<sup>5</sup>, Craig W. Osenberg<sup>4</sup>, David L. Smith<sup>6</sup>.

5 **1 University of Puerto Rico–Río Piedras, Department of Biology, San Juan, PR, USA**

6 **2 Dartmouth College, Department of Mathematics, Hanover, NH, USA**

7 **3 Statistical and Applied Mathematical Sciences Institute, Research Triangle Park, NC,  
8 USA**

9 **4 University of Florida, Department of Biology, Gainesville, FL, USA**

10 **5 University of Florida, Department of Mathematics, Gainesville, FL, USA**

11 **6 Department of Epidemiology and Malaria Research Institute, John Hopkins Bloomberg  
12 School of Public Health, Baltimore, MD, USA**

13 \* **E-mail: miguel.acevedo7@upr.edu**

## 14 Supporting Information 3

### 15 Two-patch analysis

16 We first made the following assumptions:

17 1. Each patch has identical parameters, with the exception of the ratio of mosquitoes to humans  $m_1$  and  
18  $m_2$ .

19 2.  $\bar{m} := \frac{m_1+m_2}{2}$ , the average of  $m_1$  and  $m_2$ , is fixed.

20 3.  $\bar{\alpha} := \frac{m_1}{m_2}$ , where, without loss of generality,  $m_1 > m_2$  so that  $\alpha \in (1, \infty)$ .

**Theorem 0.0.1.** *Under the above assumptions,  $R_0$  is an increasing function of the variance*

$$V = \frac{(m_1 - \bar{m})^2 + (m_2 - \bar{m})^2}{2}.$$

21 *Proof.* Note that  $\frac{\partial R_0}{\partial V} = \frac{\partial \bar{\alpha}}{\partial V} \cdot \frac{\partial R_0}{\partial \bar{\alpha}}$ . We will first show that  $\frac{\partial R_0}{\partial \bar{\alpha}} > 0$ .

22 Assumptions 2 and 3 imply that

$$(m_1, m_2) = \left( \frac{2\bar{\alpha}\bar{m}}{\bar{\alpha} + 1}, \frac{2\bar{m}}{\bar{\alpha} + 1} \right). \quad (1)$$

Using the definition of  $R_0$  described in the previous section, it is straightforward to show that  $R_0$  for our two-patch system is a special case of the  $R_0$  derived in [1]. In [1],

$$R_0 = \frac{1}{2\sigma} \left( s_1 t_2 + s_2 t_1 + \sqrt{(s_1 t_2 + s_2 t_1)^2 - 4s_1 s_2 \sigma} \right),$$

where  $\sigma = k_{12}r_1 + k_{21}r_2 + r_1r_2$ ,  $s_i = \frac{\alpha_i\beta_i}{g_i}$ , and  $t_i = r_i + k_{ji}$ . Since all patch parameters, except for  $m_1$  and  $m_2$  are identical in this manuscript, we take  $k = k_{12} = k_{21}$ ,  $r = r_1 = r_2$ ,  $\beta = \beta_1 = \beta_2$ , and  $g = g_1 = g_2$ . Subsequently, we have  $\sigma = 2kr + r^2$ ,  $s_i = \frac{\alpha_i\beta}{g}$ , and  $t = r + k = t_1 = t_2$ .

Note that  $s_1 t_2 + s_2 t_1 = s_2 t_2 \left( \frac{s_1}{s_2} + \frac{t_1}{t_2} \right) = s_2 t_2 (\bar{\alpha} + 1)$ . So,  $R_0 = \frac{s_2 t}{2\sigma} \left( \bar{\alpha} + 1 + \sqrt{(\bar{\alpha} + 1)^2 - 4\bar{\alpha} \frac{\sigma}{t^2}} \right)$ .

Recall that  $s_2 = m_2 \eta$ , where  $\eta = a^2 b c e^{-gn} / g$  (under the simplifying parameter assumptions). From the expression for  $m_2$ , we obtain  $s_2 = \frac{2\eta\bar{m}}{\bar{\alpha} + 1}$ , which yields (after simplification) an expression for  $R_0$  as a function of  $\bar{\alpha}$ :

$$R_0(\bar{\alpha}) = \eta\bar{m} \frac{t}{\sigma} \left( 1 + \sqrt{1 - 4 \frac{\bar{\alpha}}{(\bar{\alpha} + 1)^2} \cdot \frac{\sigma}{t^2}} \right).$$

Now, it remains to show that  $\frac{\partial R_0}{\partial \bar{\alpha}} > 0$  on  $(1, \infty)$ . Only the argument of the square root in  $R_0$  depends on  $\bar{\alpha}$ . Thus, to determine the sign of  $\frac{\partial R_0}{\partial \bar{\alpha}}$ , we first note that  $\frac{\partial}{\partial \bar{\alpha}} \left( \frac{\bar{\alpha}}{(\bar{\alpha} + 1)^2} \right) = \frac{1 - \bar{\alpha}}{(\bar{\alpha} + 1)^3} < 0$  on  $(1, \infty)$ . From this, it is clear that  $R_0$  is an increasing function of  $\bar{\alpha}$ .

We conclude the proof by writing  $V$  as a function of  $\bar{\alpha}$ , and illustrating that  $\frac{\partial \bar{\alpha}}{\partial V}$  is also positive. Substituting Equation (1) into the expression for the two-patch variance  $V$ , we find that  $V(\bar{\alpha} + 1)^2 = \bar{m}^2(\bar{\alpha} - 1)^2$ . Implicit differentiation with respect to  $V$ , and treating  $\bar{\alpha}$  as a function of  $V$ , yields:

$$\frac{\partial \bar{\alpha}}{\partial V} = \frac{(\bar{\alpha} + 1)^3}{4\bar{m}^2(\bar{\alpha} - 1)},$$

which is positive. In the above calculation, we used the fact that  $V(\bar{\alpha} + 1)^2 = \bar{m}^2(\bar{\alpha} - 1)^2$  to write the expression in terms of only  $\bar{m}$  and  $\bar{\alpha}$ . Consequently,  $R_0$  is an increasing function of  $V$ .

□

**Proposition 0.0.2.**  $\frac{\partial}{\partial k} \frac{\partial R_0}{\partial \bar{\alpha}} < 0$ .

34 *Proof.* Calculating  $R'_0(\bar{\alpha})$  explicitly, we obtain:  $R'_0(\bar{\alpha}) = 2\eta\bar{m} \left(1 - 4\frac{\bar{\alpha}}{(\bar{\alpha}+1)^2} \cdot \frac{\sigma}{t^2}\right)^{-\frac{1}{2}} \cdot \frac{\bar{\alpha}-1}{(\bar{\alpha}+1)^3} \cdot \frac{1}{t}$ .  
 35 Clearly,  $\frac{\partial}{\partial k} \left(\frac{1}{t}\right) < 0$  since  $t = r + k$ , and  $\frac{\partial}{\partial k} \left(\frac{\sigma}{t^2}\right) = -\frac{2rk}{(r+k)^3} < 0$ . Since  $1/t$  and  $\sigma/t^2$  are both  
 36 decreasing functions of  $k$  and no other terms in  $\frac{\partial R_0}{\partial \bar{\alpha}}$  depend on  $k$ , we observe that  $\frac{\partial R_0}{\partial \bar{\alpha}}$  must decrease  
 37 with  $k$ .

38

□

39 **Theorem 0.0.3.** *The total equilibrium prevalence in the two-patch system,  $I^* = I_1^* + I_2^*$  is an increasing*  
 40 *function of the variance  $V$ .*

*Proof.* The equilibrium equations for our two-patch system are

$$0 = ac\frac{I_i}{N}(e^{-gn} - z_i) - gz_i, \quad i = 1, 2$$

$$0 = m_i abz_i(N - I_i) - rI_i - kI_i + kI_j, \quad i = 1, 2$$

Solving for  $z_i$  in the first equation and substituting this quantity into the second equation, we obtain the equilibrium equations

$$0 = \frac{m_i a^2 b c e^{-gn}}{acI_i + gN}(N - I_i) - (r + k)I_i + kI_j, \quad i = 1, 2,$$

41 which is a special case of the equilibrium equations in [1].

From equations (33)-(34) in [1],

$$\frac{\partial I_1^*}{\partial \alpha_1} = -\frac{C_{\alpha_1} A_2}{A_1 A_2 - B_1 B_2} \tag{2}$$

$$\frac{\partial I_2^*}{\partial \alpha_1} = \frac{C_{\alpha_1} B_2}{A_1 A_2 - B_1 B_2}, \tag{3}$$

where

$$\begin{aligned}
A_i &= \alpha_i \beta (N_i^* - 2I_i^*) - t(2\beta I_i^* + gN_i^*) + k\beta I_j^* \\
&= \alpha_i \beta (N - 2I_i^*) - t(2\beta I_i^* + gN) + k\beta I_j^* \\
B_i &= k(\beta I_i^* + gN_i^*) \\
&= k(\beta I_i^* + gN) \\
C_{\alpha_1} &= \beta I_1^* (N_1^* - I_1^*) \\
&= \beta I_1^* (N - I_1^*)
\end{aligned}$$

42 Recall that  $\alpha_1 = m_1 a b e^{-gn} = \frac{2\bar{\alpha}\bar{m}}{\bar{\alpha}+1} a b e^{-gn}$ .

This fact, along with equations (2)-(3), implies that

$$\frac{\partial I^*}{\partial \bar{\alpha}} = \frac{\partial \alpha_1}{\bar{\alpha}} \frac{\partial I^*}{\partial \alpha_1} = \frac{2\bar{m} a b e^{-gn}}{(\bar{\alpha} + 1)^2} \cdot \frac{C_{\alpha_1} (B_2 - A_2)}{A_1 A_2 - B_1 B_2}.$$

43 Proposition 5.0.1 in [1] states that  $A_1 A_2 - B_1 B_2 > 0$ , and the proof of this proposition states that  
44  $A_2 < 0$ . Thus,  $B_2 - A_2 > 0$  implies that  $\frac{\partial I^*}{\partial \bar{\alpha}} > 0$ . Recall that in the proof of the previous theorem, we  
45 showed that  $\partial \bar{\alpha} / \partial V > 0$ ; consequently,  $I^*$  is an increasing function of the variance  $V$ .

46

□

## 47 References

- 48 1. Prosper O, Ruktanonchai N, Martcheva M (2012) Assessing the role of spatial heterogeneity and  
49 human movement in malaria dynamics and control. *Journal of Theoretical Biology* 303: 1–14.
